# Supplementary material for: Economic Burden of COPD in the Presence of Comorbidities
Source: PubMed Central journal article supplement — Chest. 2015 Feb 12;148(1):138–50. doi: 10.1378/chest.14-2434 (PMC4493870; doi:10.1378/chest.14-2434), 2015-02-12
Supplement: chest_148_1_138_ds01.pdf [file chest_148_1_138_ds01.pdf]

## Economic Burden of COPD in the Presence of Comorbidities

David M. Mannino, MD, FCCP; Keiko Higuchi, MPH; Tzy-Chyi Yu, PhD, MHA; Huanxue Zhou, MS; Yangyang Li, MS; Haijun Tian, PhD; and Kangho Suh, PharmD

CHEST 2015; 148(1):138-150

**e-Table 1. ICD-9-CM Codes for Comorbidities of Interest**

| <b>Comorbidity</b>                                                                                  | <b>ICD-9-CM Code</b>                                                                                                                                                                                                                                                                                                                                                                                                                                                                                                                                                                                                                                                                                                                                    |
|-----------------------------------------------------------------------------------------------------|---------------------------------------------------------------------------------------------------------------------------------------------------------------------------------------------------------------------------------------------------------------------------------------------------------------------------------------------------------------------------------------------------------------------------------------------------------------------------------------------------------------------------------------------------------------------------------------------------------------------------------------------------------------------------------------------------------------------------------------------------------|
| <b>CKD</b>                                                                                          |                                                                                                                                                                                                                                                                                                                                                                                                                                                                                                                                                                                                                                                                                                                                                         |
| Chronic kidney disease (Depressed GFR) <sup>1</sup>                                                 | DX 016.00, 016.01, 016.02, 016.03, 016.04, 016.05, 016.06, 095.4, 189.0, 189.9, 223.0, 236.91, 249.40, 249.41, 250.40, 250.41, 250.42, 250.43, 271.4, 274.10, 283.11, 403.01, 403.11, 403.91, 404.02, 404.03, 404.12, 404.13, 404.92, 404.93, 440.1, 442.1, 572.4, 580.0, 580.4, 580.81, 580.89, 580.9, 581.0, 581.1, 581.2, 581.3, 581.81, 581.89, 581.9, 582.0, 582.1, 582.2, 582.4, 582.81, 582.89, 582.9, 583.0, 583.1, 583.2, 583.4, 583.6, 583.7, 583.81, 583.89, 583.9, 584.5, 584.6, 584.7, 584.8, 584.9, 585, 585.1, 585.2, 585.3, 585.4, 585.5, 585.6, 585.9, 586, 587, 588.0, 588.1, 588.81, 588.89, 588.9, 591, 753.12, 753.13, 753.14, 753.15, 753.16, 753.17, 753.19, 753.20, 753.21, 753.22, 753.23, 753.29, 794.4 (any DX on the claim) |
| <b>CVD</b>                                                                                          |                                                                                                                                                                                                                                                                                                                                                                                                                                                                                                                                                                                                                                                                                                                                                         |
| <b>(congestive heart failure, stroke, acute myocardial infarction, peripheral vascular disease)</b> |                                                                                                                                                                                                                                                                                                                                                                                                                                                                                                                                                                                                                                                                                                                                                         |
| Congestive heart failure <sup>1</sup>                                                               | DX 398.91, 402.01, 402.11, 402.91, 404.01, 404.11, 404.91, 404.03, 404.13, 404.93, 428.0, 428.1, 428.20, 428.21, 428.22, 428.23, 428.30, 428.31, 428.32, 428.33, 428.40, 428.41, 428.42, 428.43, 428.9 (any DX on the claim)                                                                                                                                                                                                                                                                                                                                                                                                                                                                                                                            |
| Stroke /Transient Ischemic Attack <sup>1</sup>                                                      | DX 430, 431, 433.01, 433.11, 433.21, 433.31, 433.81, 433.91, 434.00, 434.01, 434.10, 434.11, 434.90, 434.91, 435.0, 435.1, 435.3, 435.8, 435.9, 436, 997.02 (any DX on the claim)                                                                                                                                                                                                                                                                                                                                                                                                                                                                                                                                                                       |

*Online supplements are not copyedited prior to posting.*

|                   |                                                               |                                                                                                                                                                                                                                                                                                                                                                                |
|-------------------|---------------------------------------------------------------|--------------------------------------------------------------------------------------------------------------------------------------------------------------------------------------------------------------------------------------------------------------------------------------------------------------------------------------------------------------------------------|
|                   | Acute myocardial infarction <sup>1</sup>                      | DX 410.01, 410.11, 410.21, 410.31, 410.41, 410.51, 410.61, 410.71, 410.81, 410.91 (ONLY first or second DX on the claim)                                                                                                                                                                                                                                                       |
|                   | Peripheral artery disease (Suggestions from CCS) <sup>2</sup> |                                                                                                                                                                                                                                                                                                                                                                                |
|                   | 114 Peripheral and visceral atherosclerosis                   | 440.0, 440.1, 440.2, 440.20, 440.21, 440.22, 440.23, 440.29, 440.4, 440.8, 440.9, 443.9, 557.0, 557.1, 557.9                                                                                                                                                                                                                                                                   |
|                   | 115 Aortic; peripheral; and visceral artery aneurysms         | 441.0, 441.00, 441.01, 441.02, 441.03, 441.1, 441.2, 441.3, 441.4, 441.5, 441.6, 441.7, 441.9, 442.0, 442.1, 442.2, 442.3, 442.81, 442.82, 442.83, 442.84, 442.89, 442.9, 443.21, 443.22, 443.23, 443.24, 443.29, 447.70, 447.71, 447.72, 447.73                                                                                                                               |
|                   | 116 Aortic and peripheral arterial embolism or thrombosis     | 444.0, 444.01, 444.09, 444.1, 444.21, 444.22, 444.81, 444.89, 444.9, 445.01, 445.02, 445.81, 445.89                                                                                                                                                                                                                                                                            |
|                   | 117 Other circulatory disease                                 | 443.0, 443.1, 443.81, 443.82, 443.89, 446.0, 446.1, 446.2, 446.20, 446.21, 446.29, 446.3, 446.4, 446.5, 446.6, 446.7, 447.0, 447.1, 447.2, 447.3, 447.4, 447.5, 447.6, 447.8, 447.9, 448.0, 448.1, 448.9, 458.0, 458.1, 458.8, 458.9, 459.0, 459.89, 459.9, 785.9, 794.30, 794.31, 794.39, 796.2, V125, V1250, V1253, V1254, V1259, V151, V421, V432, V4321, V4322, V434, V717 |
| <b>Asthma</b>     | Asthma <sup>1</sup>                                           | DX 493.00, 493.01, 493.02, 493.10, 493.11, 493.12, 493.20, 493.21, 493.22, 493.81, 493.82, 493.90, 493.91, 493.92, (any DX on the claim)                                                                                                                                                                                                                                       |
| <b>Depression</b> | Depression <sup>1</sup>                                       | DX 296.20, 296.21, 296.22, 296.23, 296.24, 296.25, 296.26, 296.30, 296.31, 296.32, 296.33, 296.34, 296.35, 296.36, 296.51, 296.52, 296.53, 296.54, 296.55, 296.56, 296.60, 296.61, 296.62, 296.63, 296.64, 296.65, 296.66, 296.89, 298.0, 300.4, 309.1, 311 (any DX on the claim)                                                                                              |

*Online supplements are not copyedited prior to posting.*

|                     |                           |                                                                                                                                                                                                                                                                                                                                                                                                                                                                                                                                                                                        |
|---------------------|---------------------------|----------------------------------------------------------------------------------------------------------------------------------------------------------------------------------------------------------------------------------------------------------------------------------------------------------------------------------------------------------------------------------------------------------------------------------------------------------------------------------------------------------------------------------------------------------------------------------------|
| <b>Diabetes</b>     | Diabetes <sup>1</sup>     | DX 249.00, 249.01, 249.10, 249.11, 249.20, 249.21, 249.30, 249.31, 249.40, 249.41, 249.50, 249.51, 249.60, 249.61, 249.70, 249.71, 249.80, 249.81, 249.90, 249.91, 250.00, 250.01, 250.02, 250.03, 250.10, 250.11, 250.12, 250.13, 250.20, 250.21, 250.22, 250.23, 250.30, 250.31, 250.32, 250.33, 250.40, 250.41, 250.42, 250.43, 250.50, 250.51, 250.52, 250.53, 250.60, 250.61, 250.62, 250.63, 250.70, 250.71, 250.72, 250.73, 250.80, 250.81, 250.82, 250.83, 250.90, 250.91, 250.92, 250.93, 357.2, 362.01, 362.02, 362.03, 362.04, 362.05, 362.06, 366.41 (any DX on the claim) |
| <b>Osteoporosis</b> | Osteoporosis <sup>1</sup> | DX 733.00, 733.01, 733.02, 733.03, 733.09 (any DX on the claim)                                                                                                                                                                                                                                                                                                                                                                                                                                                                                                                        |
| <b>Anemia</b>       | Anemia <sup>1</sup>       | DX 280.0, 280.1, 280.8, 280.9, 281.0, 281.1, 281.2, 281.3, 281.4, 281.8, 281.9, 282.0, 282.1, 282.2, 282.3, 282.41, 282.42, 282.49, 282.5, 282.60, 282.61, 282.62, 282.63, 282.64, 282.68, 282.69, 282.7, 282.8, 282.9, 283.0, 283.10, 283.11, 283.19, 283.2, 283.9, 284.01, 284.09, 284.1, 284.2, 284.81, 284.89, 284.9, 285.0, 285.1, 285.21, 285.22, 285.29, 285.3, 285.8, 285.9 (any DX on the claim)                                                                                                                                                                              |

CCS= Clinical Classifications Software; DX=diagnosis; HCUP= Healthcare Cost and Utilization Project; GFR=glomerular filtration rate.

<sup>1</sup>Chronic Conditions Data Warehouse. Condition Categories.

<http://www.ccwdata.org/web/guest/condition-categories>. Accessed July 10, 2013.

<sup>2</sup>HCUP Clinical Classifications Software for ICD-9-CM. Healthcare Cost and Utilization Project. 2013. Agency for Healthcare Research and Quality, Rockville, MD. [www.hcup-us.ahrq.gov/toolssoftware/ccs/ccs.jsp](http://www.hcup-us.ahrq.gov/toolssoftware/ccs/ccs.jsp). Accessed June 17, 2013.

*Online supplements are not copyedited prior to posting.*
